# Supplementary material for: Sparse logistic regression revealed the associations between HBV PreS quasispecies and hepatocellular carcinoma
Source: Springer Nature journal article supplement (doi:10.1186/s12985-022-01836-9), 2022-06-28
Supplement: MOESM1 [file 23215678]

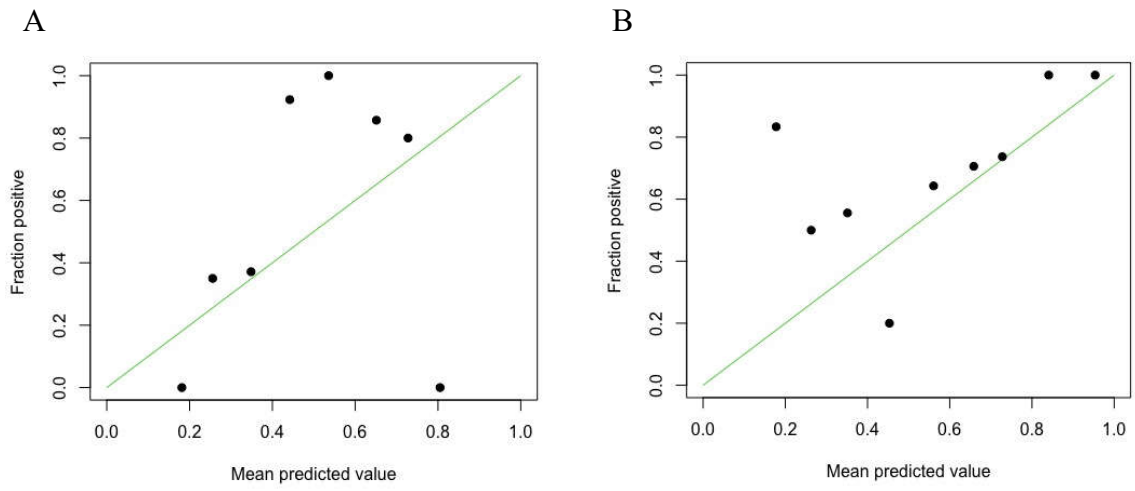

Figure S1. : Reliability diagram for SLR without calibration (A), and calibrated SSVM using platt calibration (B).
