# Supplementary material for: Sparse logistic regression revealed the associations between HBV PreS quasispecies and hepatocellular carcinoma
Source: Springer Nature journal article supplement (doi:10.1186/s12985-022-01836-9), 2022-06-28

Figure 2: A) Classification results for HCC/CHB patients of genotype B for different  $\lambda$ s.  
B) Classification results for HCC/CHB patients of genotype C for different parameter  $\lambda$ s.

A

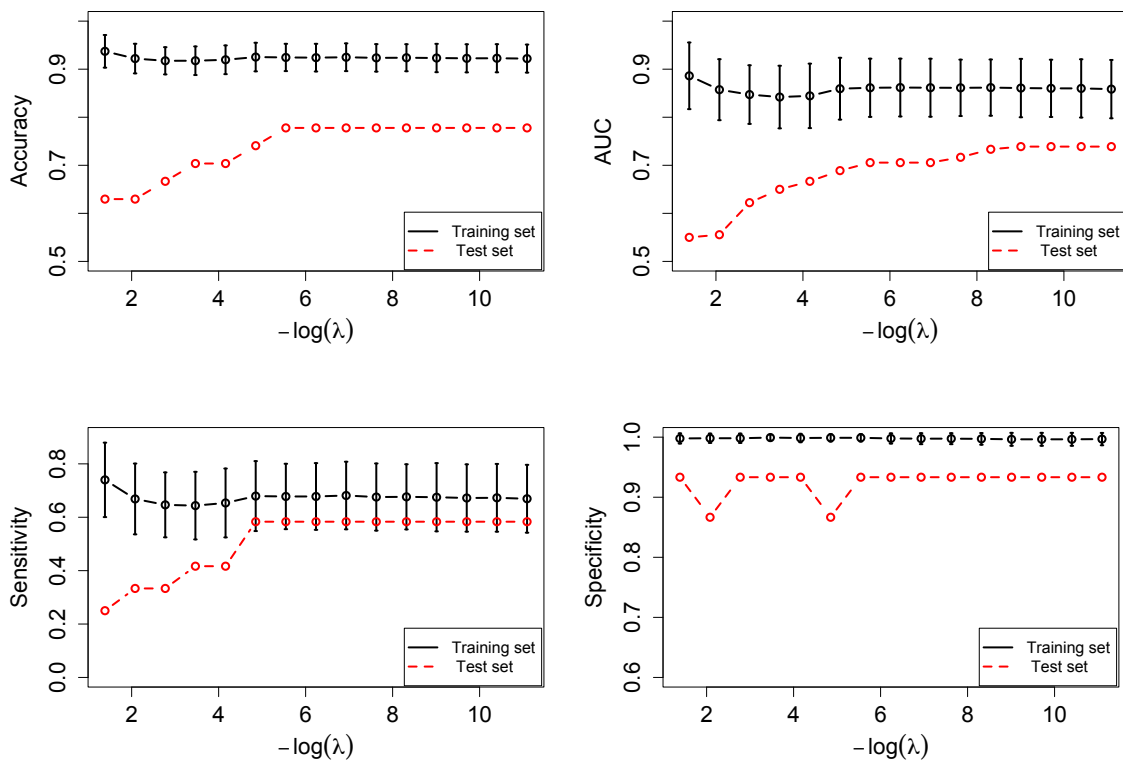

**B**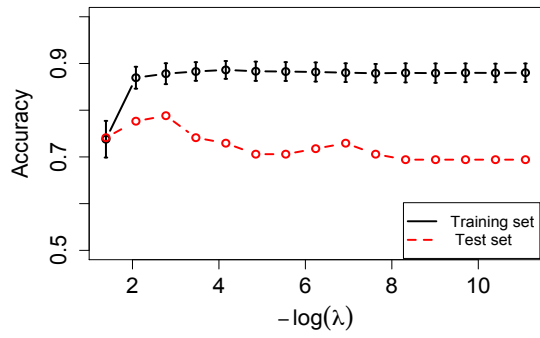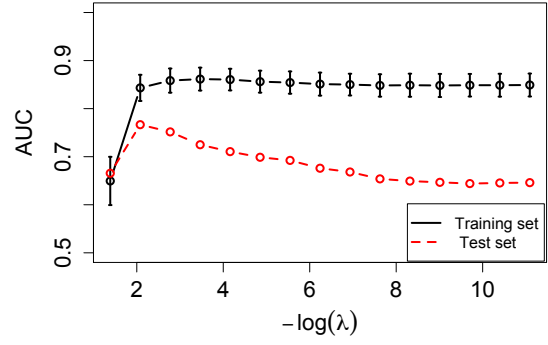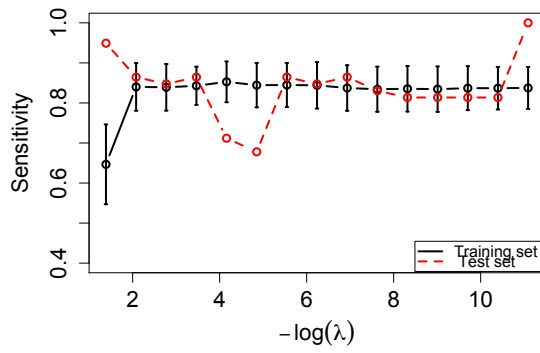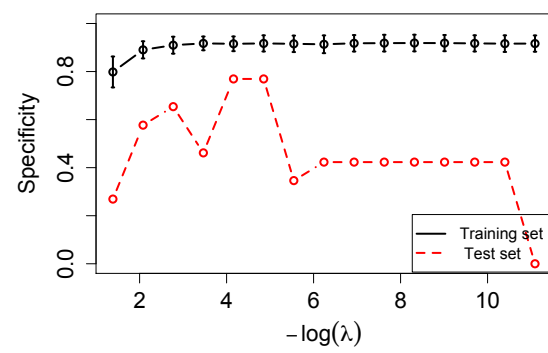

Supplement: MOESM3 [file 23215678]
