# Supplementary material for: Sparse logistic regression revealed the associations between HBV PreS quasispecies and hepatocellular carcinoma
Source: Springer Nature journal article supplement (doi:10.1186/s12985-022-01836-9), 2022-06-28

**A**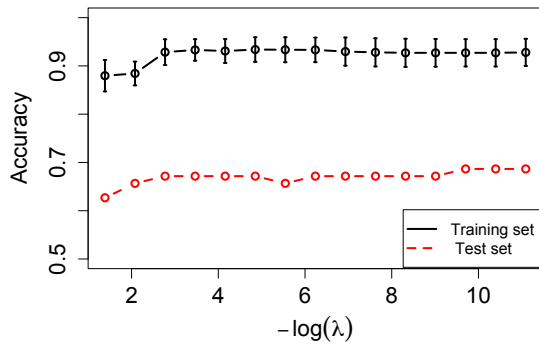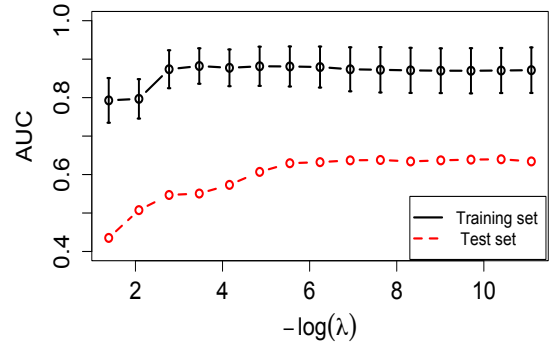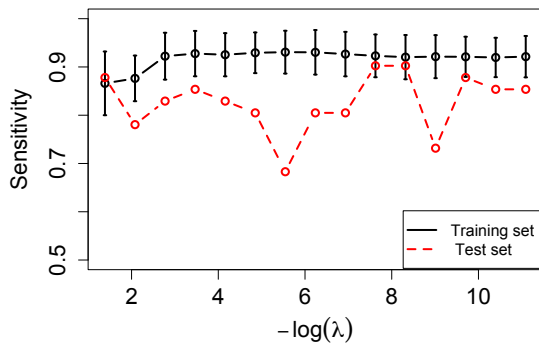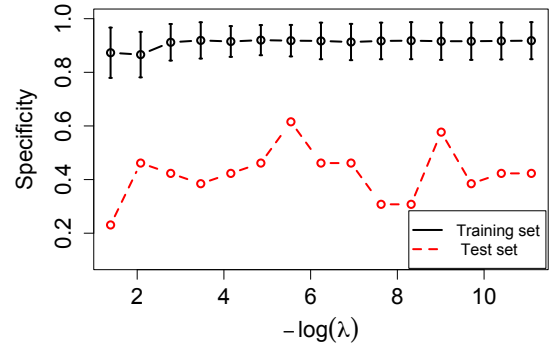**B**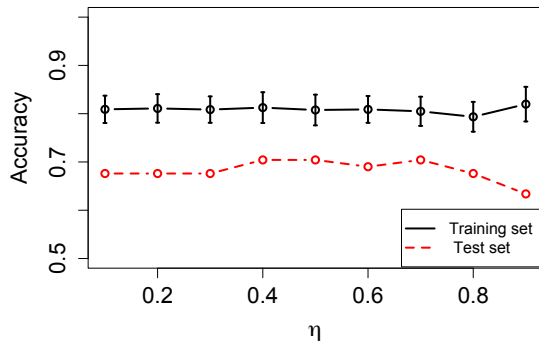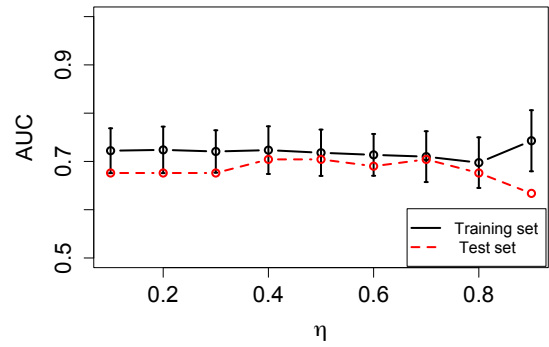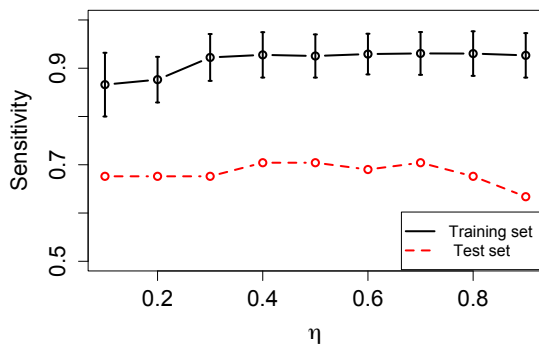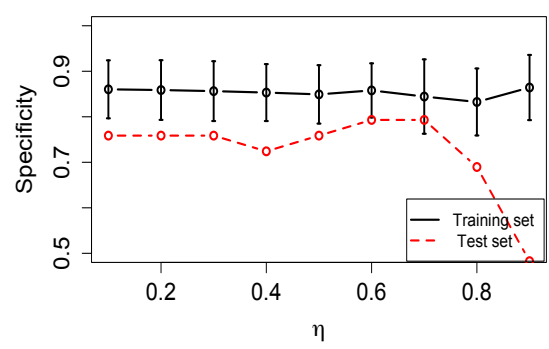

C

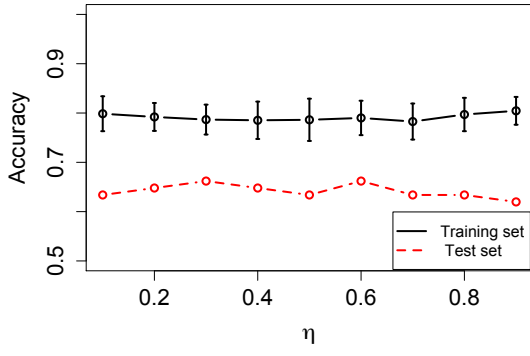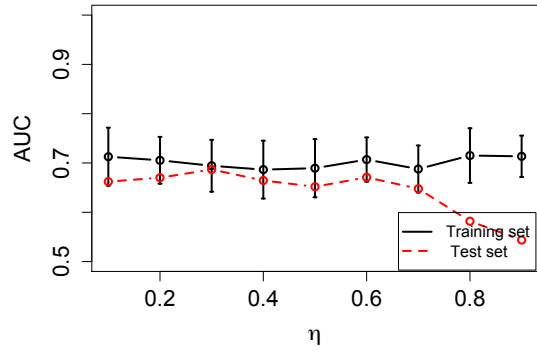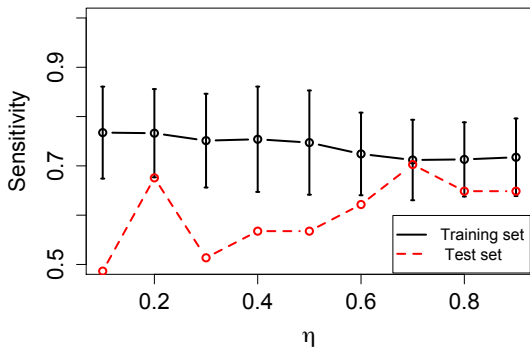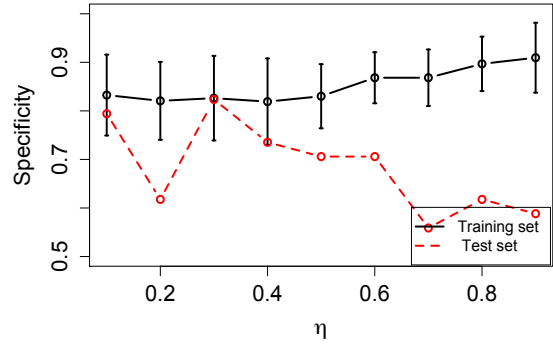

Supplement: MOESM4 [file 23215678]
